# Supplementary material for: α-Tocopherol Attenuates Oxidative Phosphorylation of CD34+ Cells, Enhances Their G0 Phase Fraction and Promotes Hematopoietic Stem and Primitive Progenitor Cell Maintenance
Source: MDPI journal article supplement (doi:10.3390/biom11040558), 2021-04-10
Supplement: s1 [file s1]

S1

log % CD45

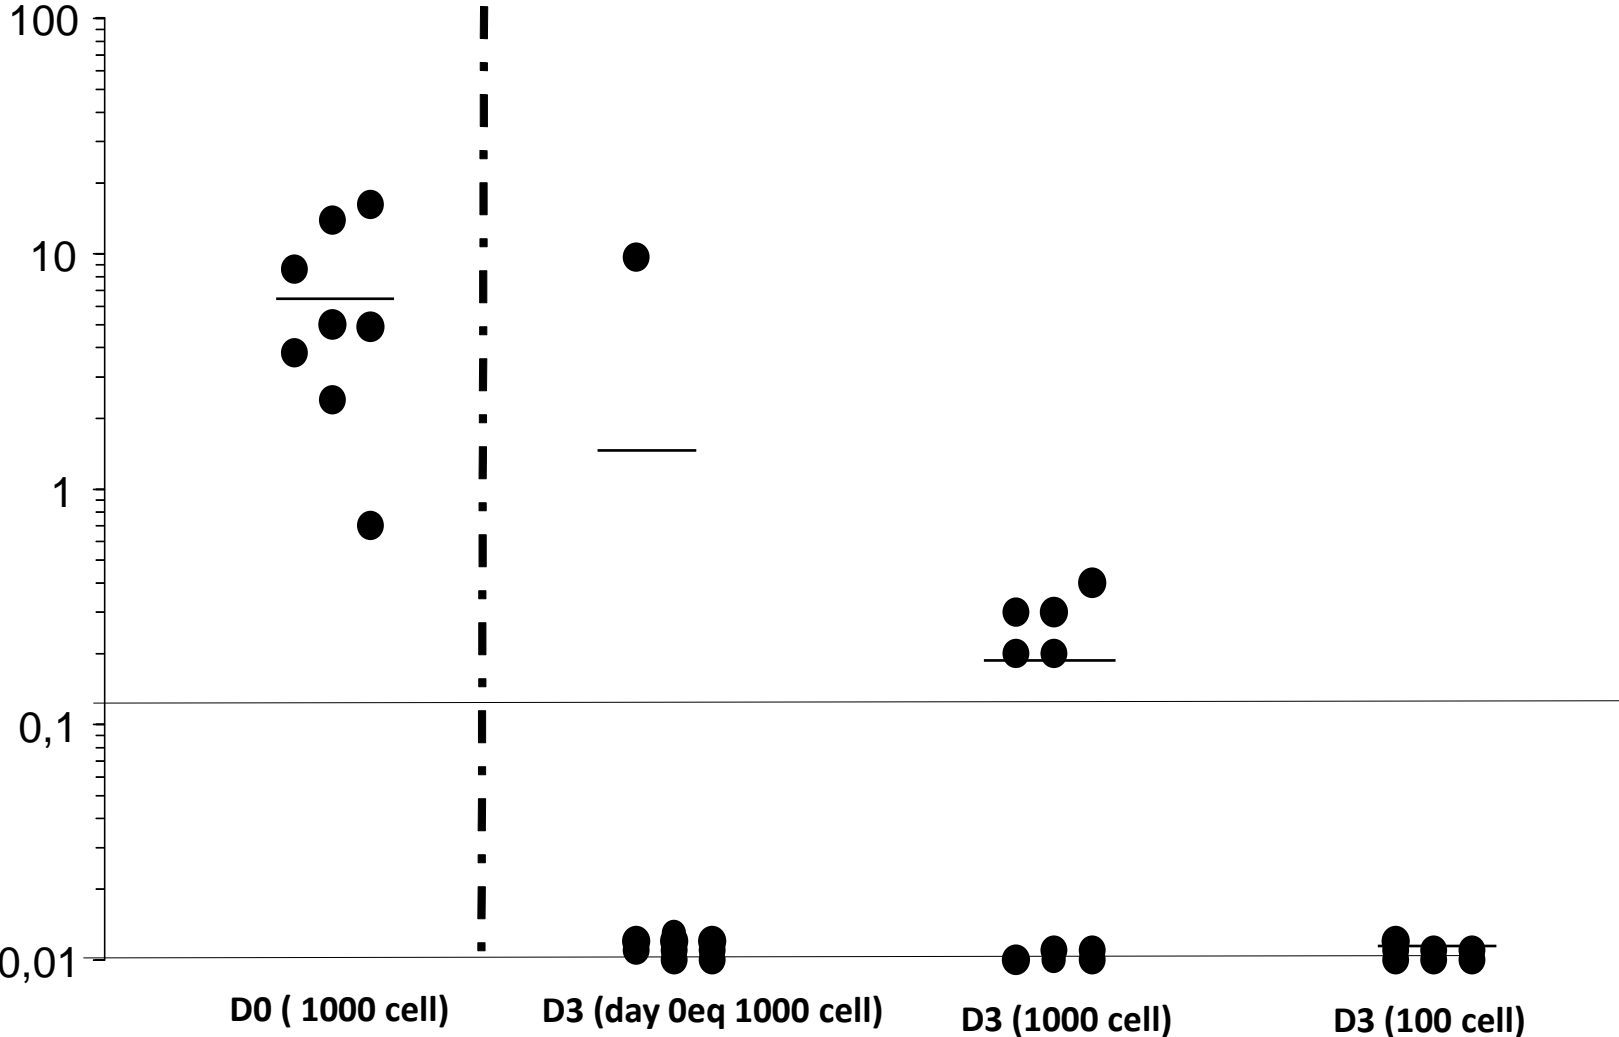

$\alpha$ TOA in supra-physiological dose (150 $\mu$ M) decreases SRC activity after 3 days of culture.

S2

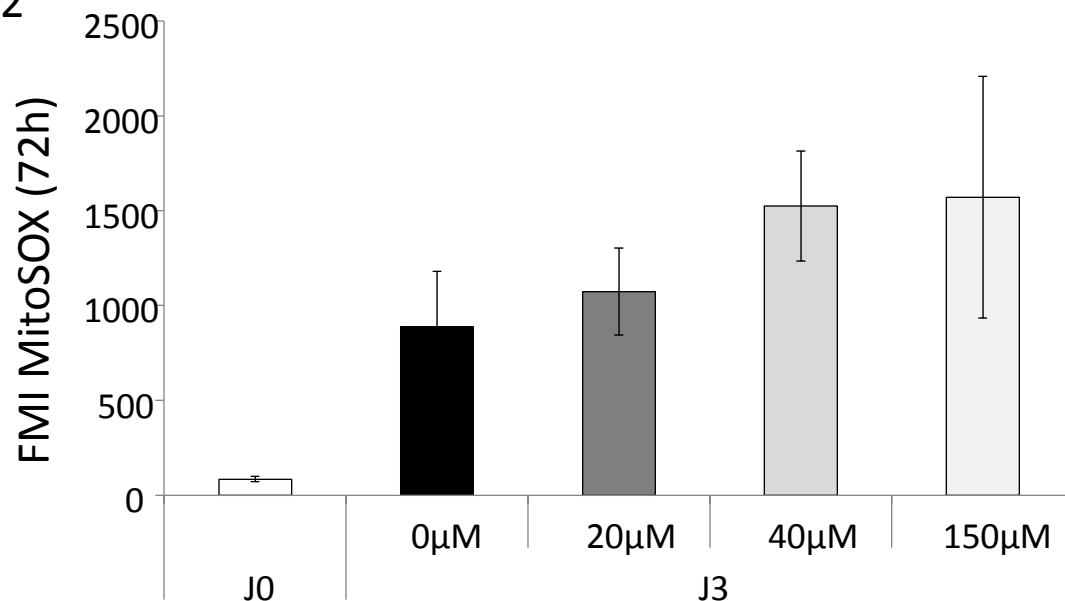

Mitochondrial ROS increase after 3 days of primary culture with  $\alpha$ TOA. N = 3

S3

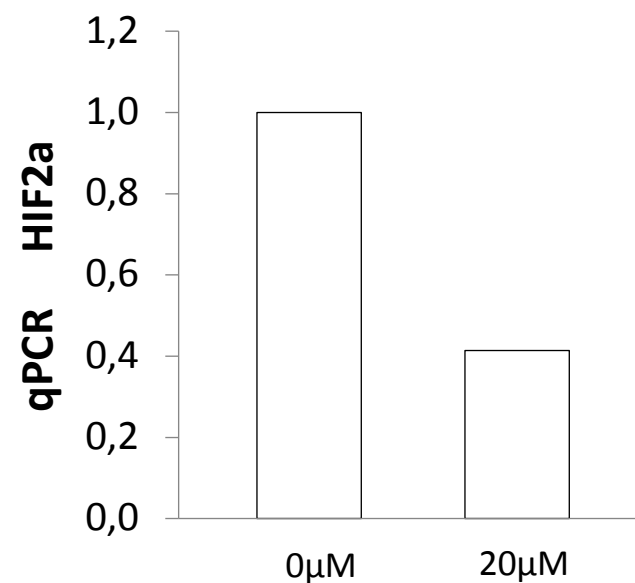

mRNA of HIF2 $\alpha$  decrease after 3 days with 20  $\mu$ M of  $\alpha$ TOA. N = 2

S3

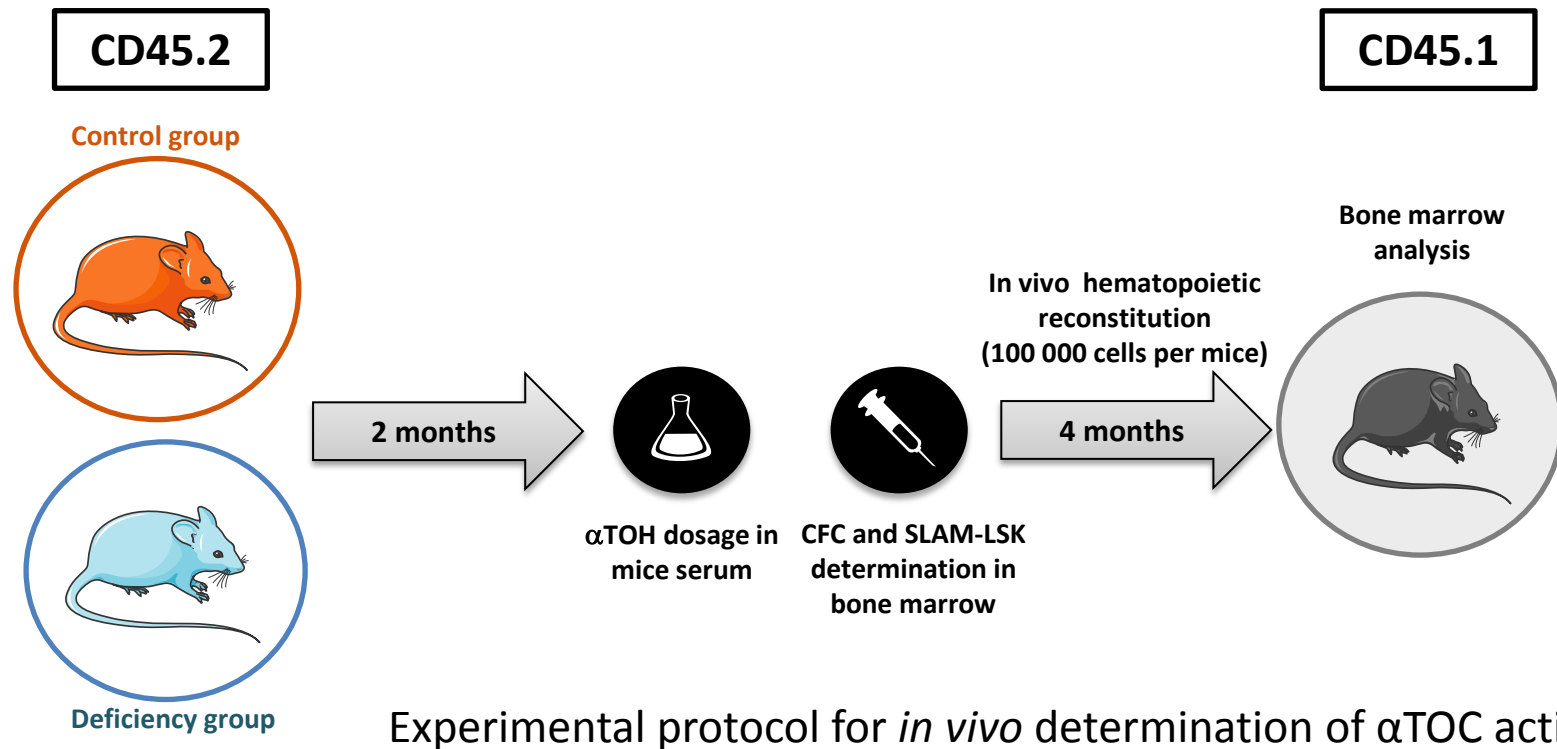

S4

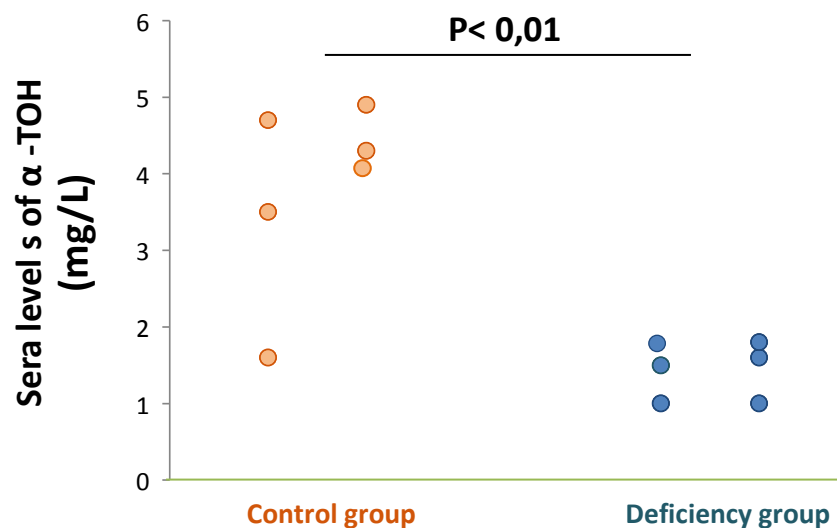

Levels of αTOC in mice sera after 2 months of specific diet

S5 heart-shaped BFU-E colonies

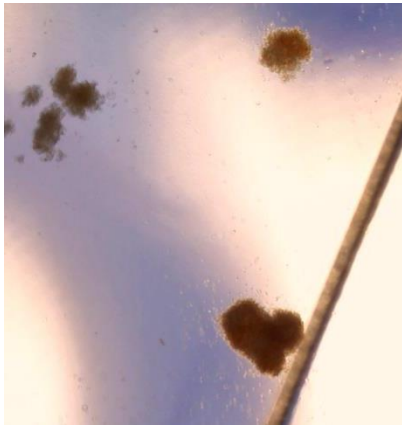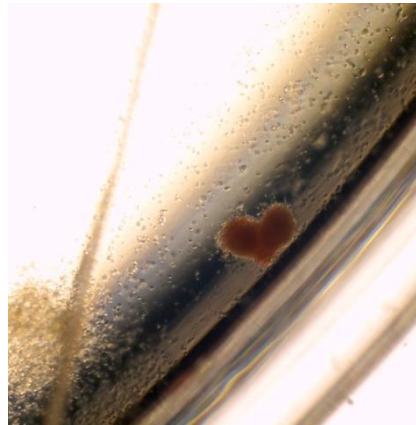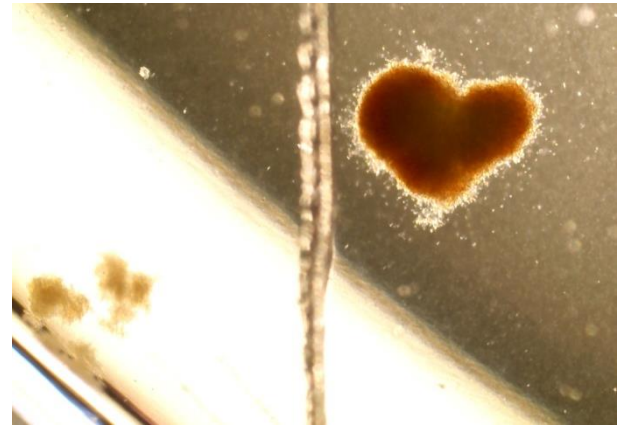

Heart-shaped BFU-E colonies in the methylcellulose cultures grown from cells treated with  $\alpha$ TOA

## Complete Blots of HIF2 $\alpha$

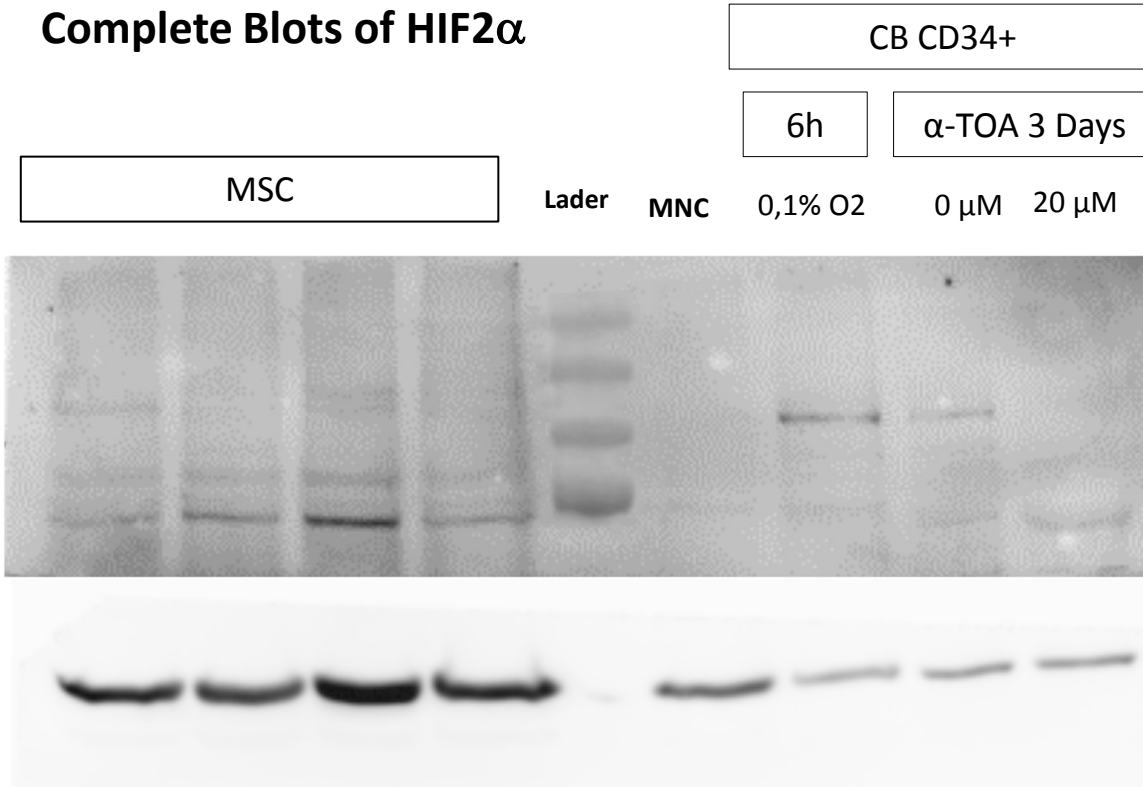

## Complete Blots of HIF1 $\alpha$

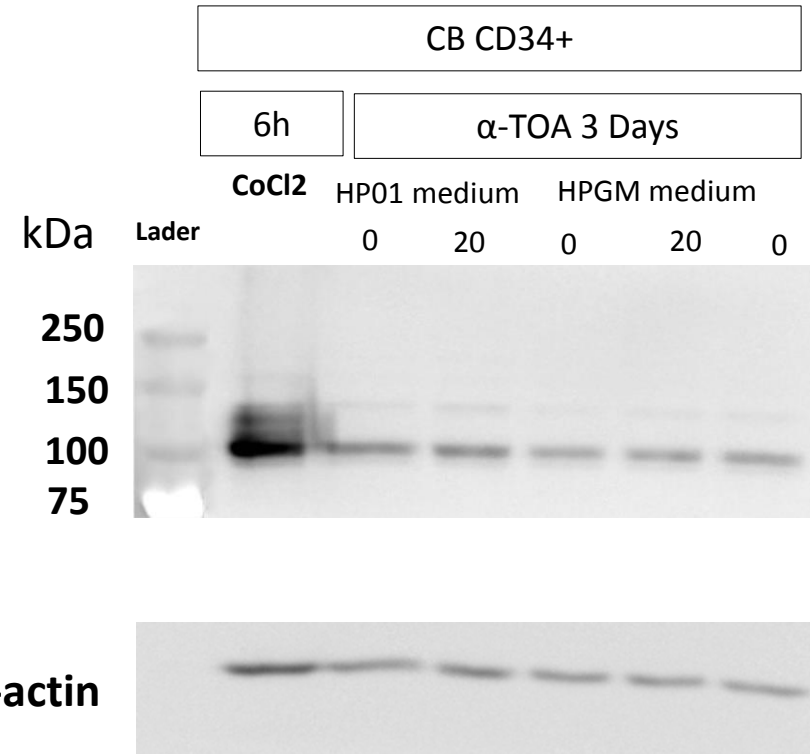

- In order to reveal primary antibody (anti-HIFs ) and loading control in the same time we cut the membrane in two parts.
- HIFs proteins have a higher molecular weight (<75kDa) and b-actin a smaller one (43kDa) and all bands are in line according to predicted size.
- Left part of HIF2 $\alpha$  blot was removed for Figure 6 because tested samples were from an other human cell type (Mesenchymal Stromal Cells - MSC)
- Right part of HIF1 $\alpha$  blot was removed for Figure 6. We tested an other culture medium.
